# Supplementary material for: Median bed-material sediment particle size across rivers in the contiguous US
Source: Copernicus journal article supplement (doi:10.5194/essd-14-929-2022), 2022-02-24
Supplement: Supplementary file 1 [file essd-14-929-2022-supplement.pdf]

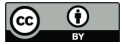

*Supplement of*

## **Median bed-material sediment particle size across rivers in the contiguous US**

**Guta Wakbulcho Abeshu et al.**

*Correspondence to:* Hong-Yi Li ([hongyili.jadison@gmail.com](mailto:hongyili.jadison@gmail.com)) and Zhenduo Zhu ([zhenduo@buffalo.edu](mailto:zhenduo@buffalo.edu))

The copyright of individual parts of the supplement might differ from the article licence.

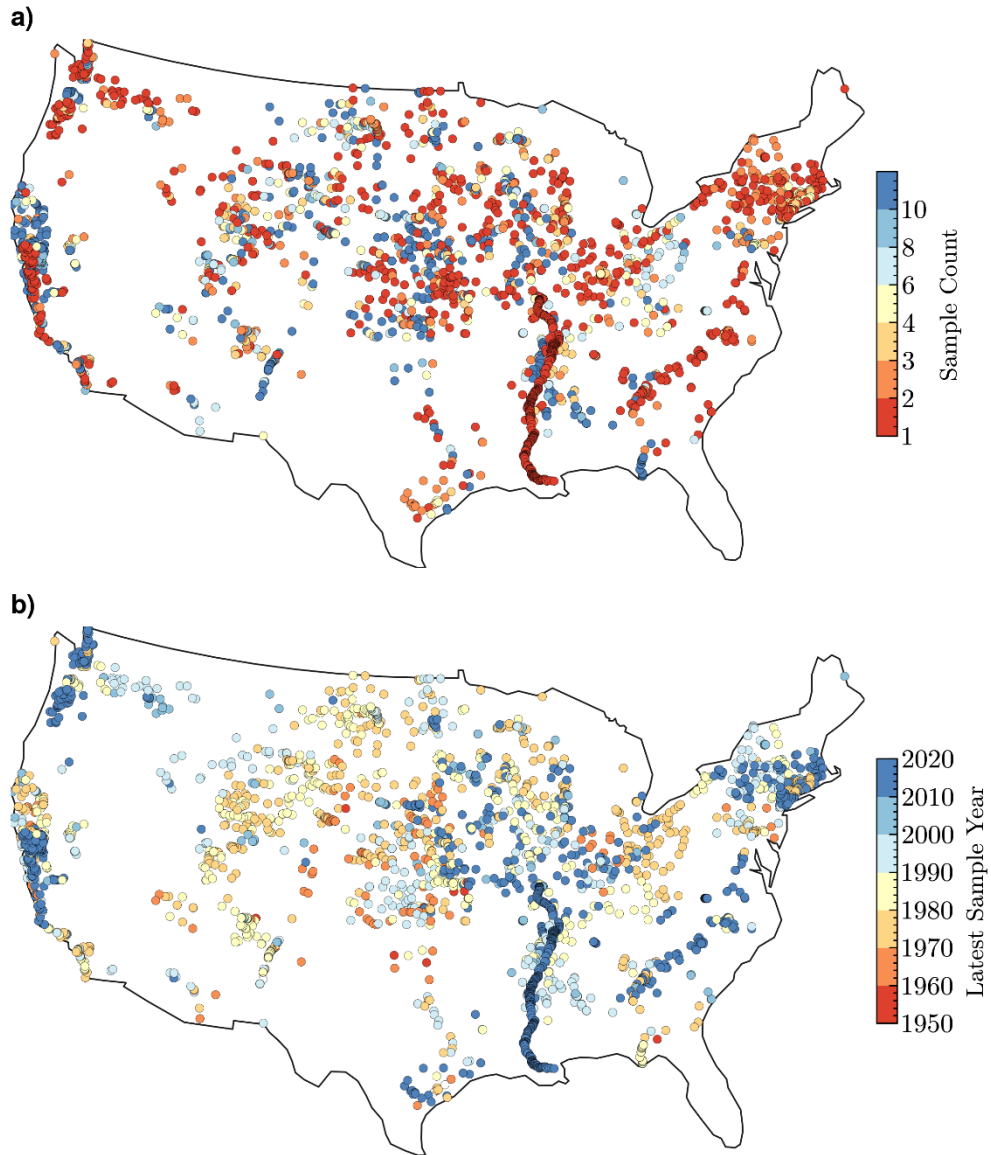

Figure S1: Spatial distribution of sample counts (a) and latest sampling year (b) of the 2577 sampling locations.

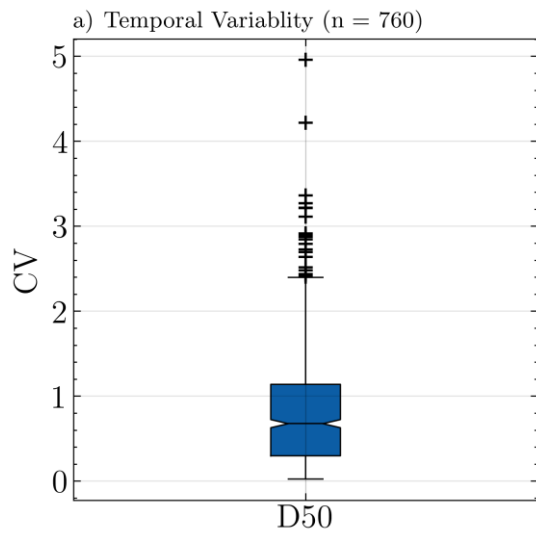

Figure S2: Distribution of the coefficient of variation (CV) for the 760 stations that have at least 5 samples over time.

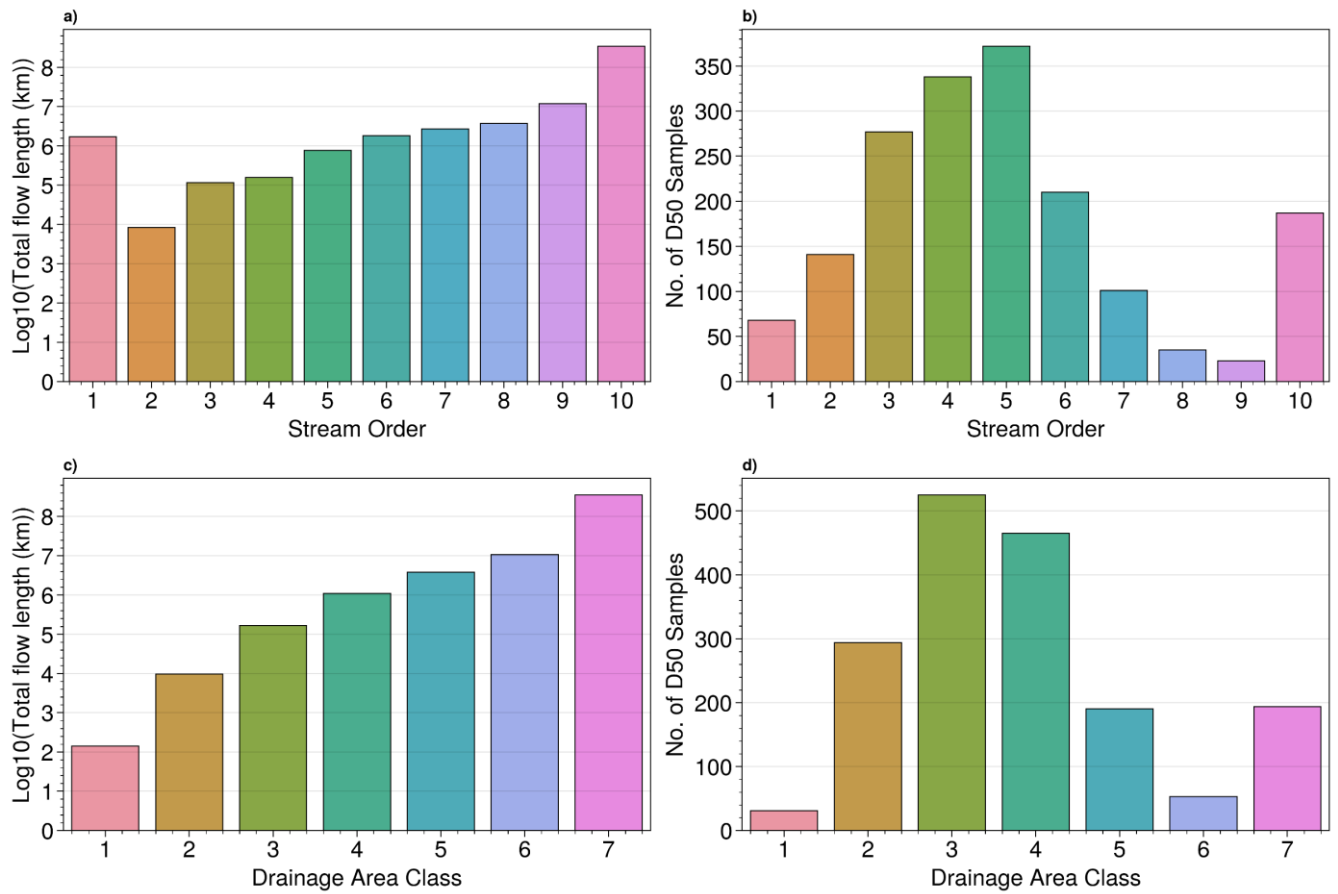

Figure S3: Distributions of total channel length (a,c) and number of D50 samples (b,d) within different classes of stream orders (a,b) and drainage areas (c,d). For Fig. 2 (c), (d), Drainage area class corresponds to categories of streams based on drainage areas, i.e., Class 1,  $\leq 10$ sqkm; Class 2,  $10 \sim 100$ sqkm; Class 3,  $100 \sim 1000$ sqkm; Class 4,  $1000 \sim 1e+4$ sqkm; Class 5,  $1e+4 \sim 1e+5$ sqkm; Class 6,  $1e5 \sim 1e+6$ sqkm; Class 7),  $> 1e+6$ sqkm.

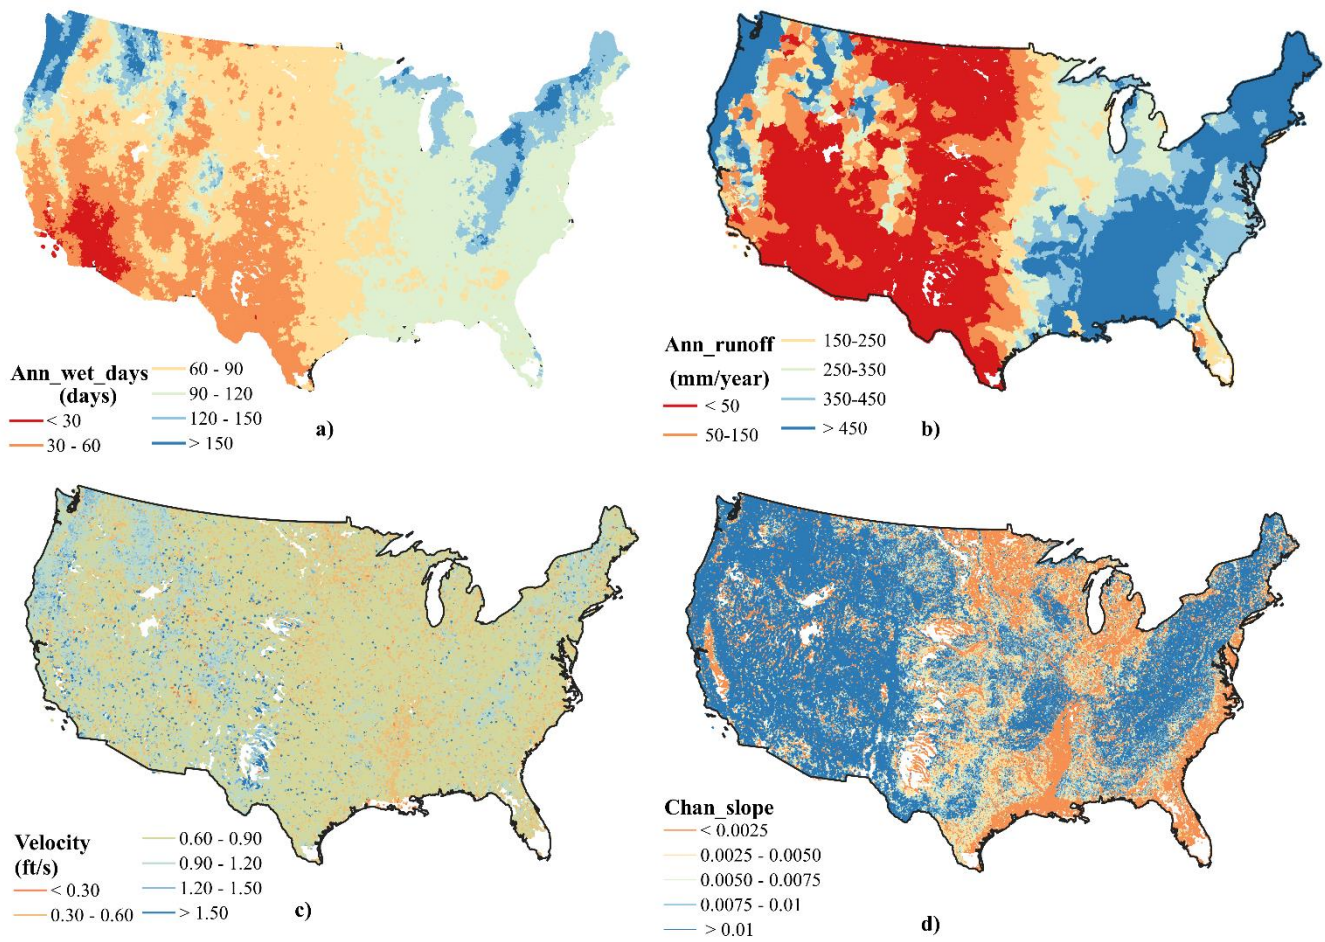

Figure S4: Spatial maps of predictive variables from NHDPlus. a. Annual average number of wet days (Ann\_wet\_days); b. Mean annual runoff (Ann\_runoff); c. Mean annual flow velocity (Velocity); d. Slope of the flowline (Chan\_slope).

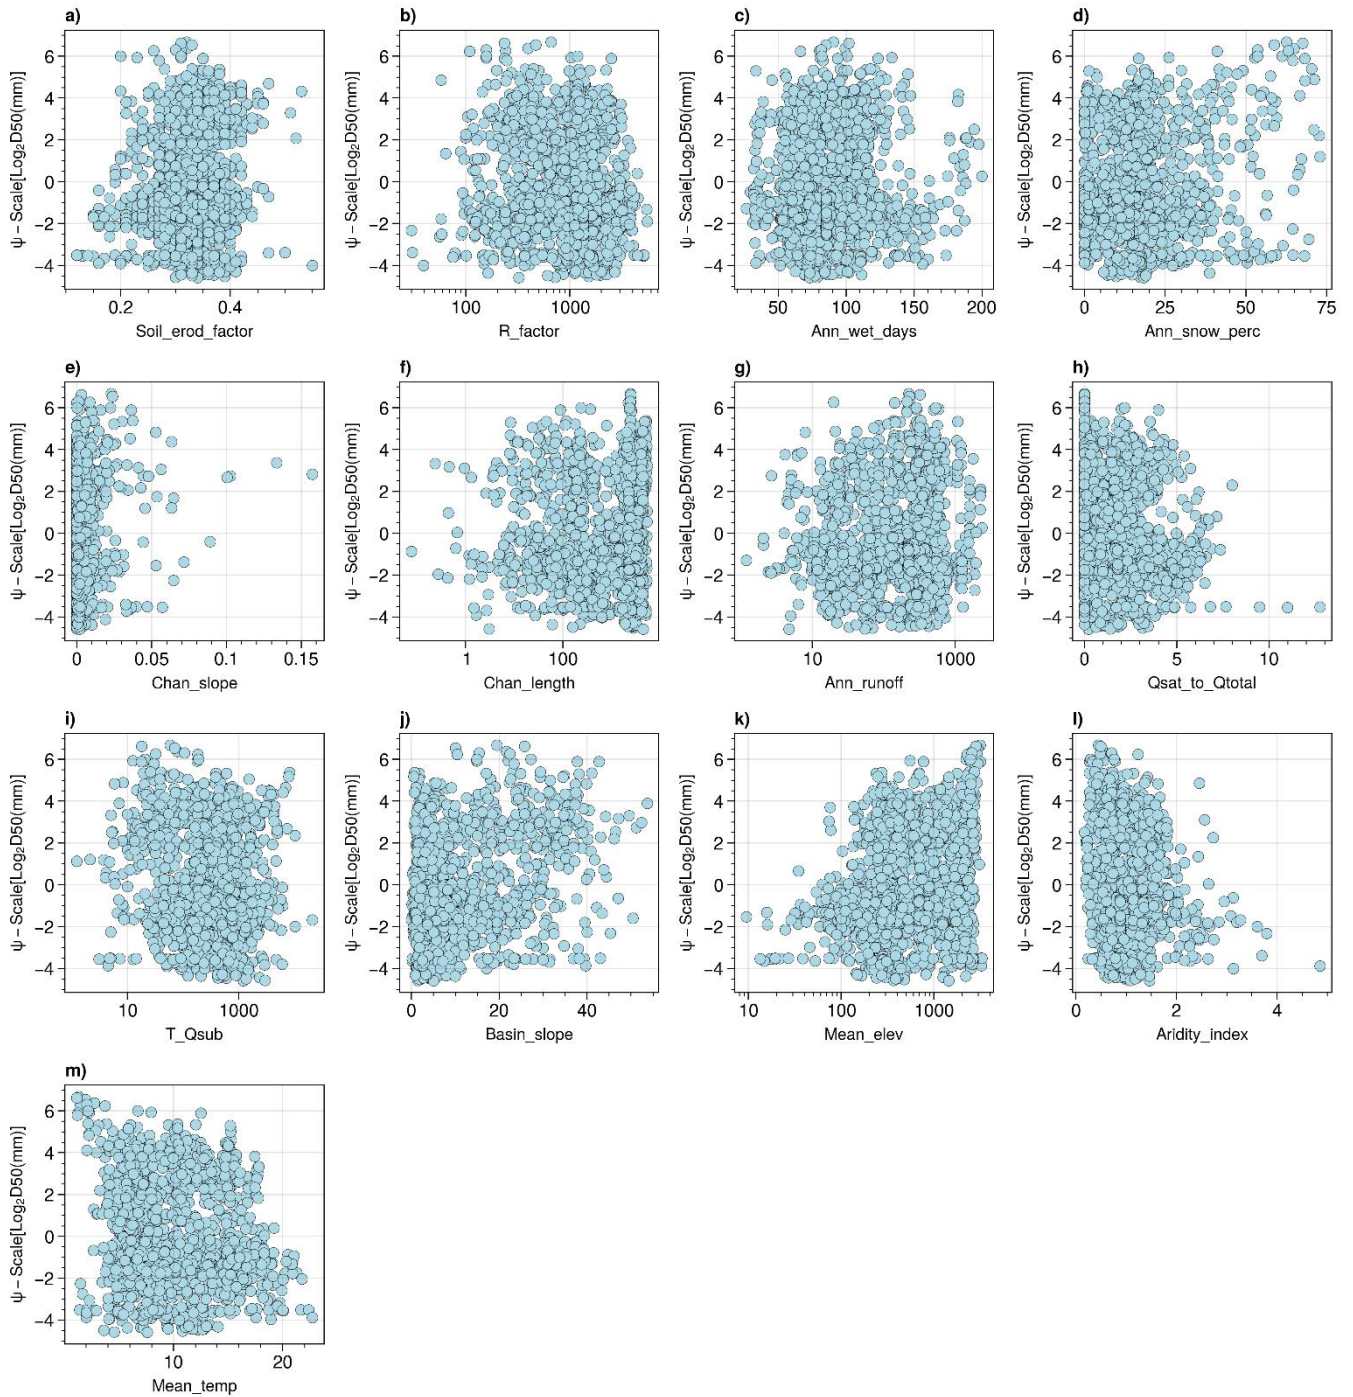

Figure S5. Scatter plots between D50 and the selected 13 features

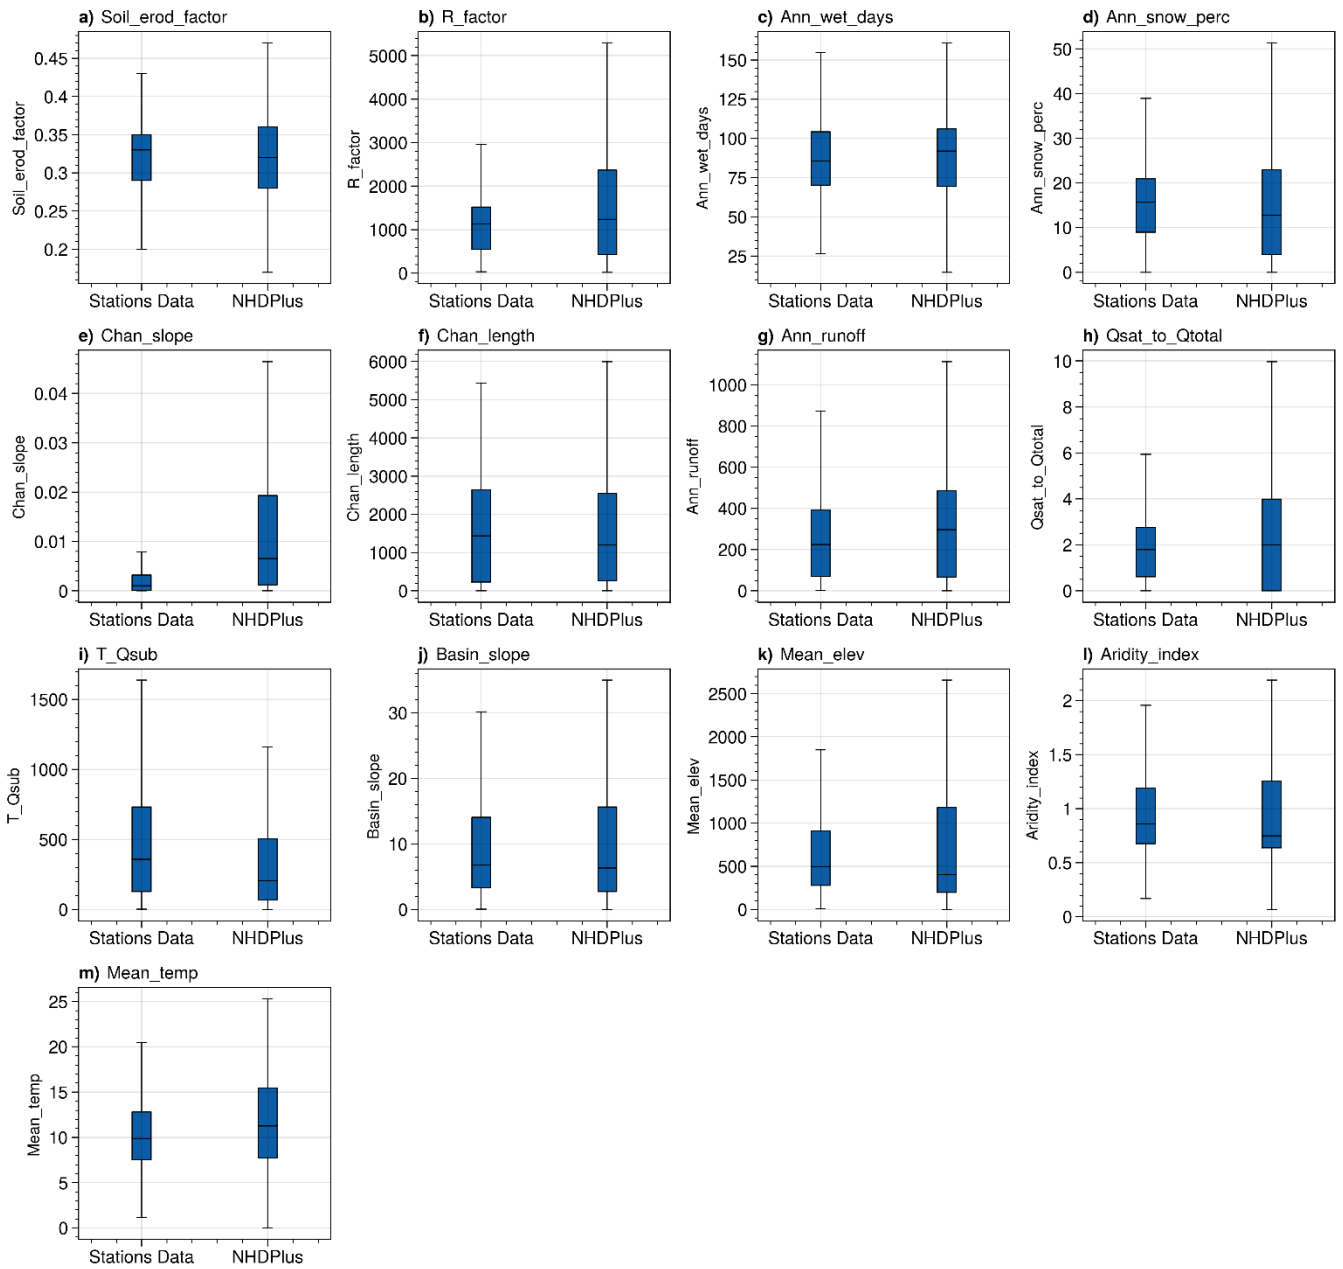

Figure S6: Box plots for the comparison of the ranges of 13 parameters between stations with measured D50 data and all flowlines (i.e., NHDPlus).

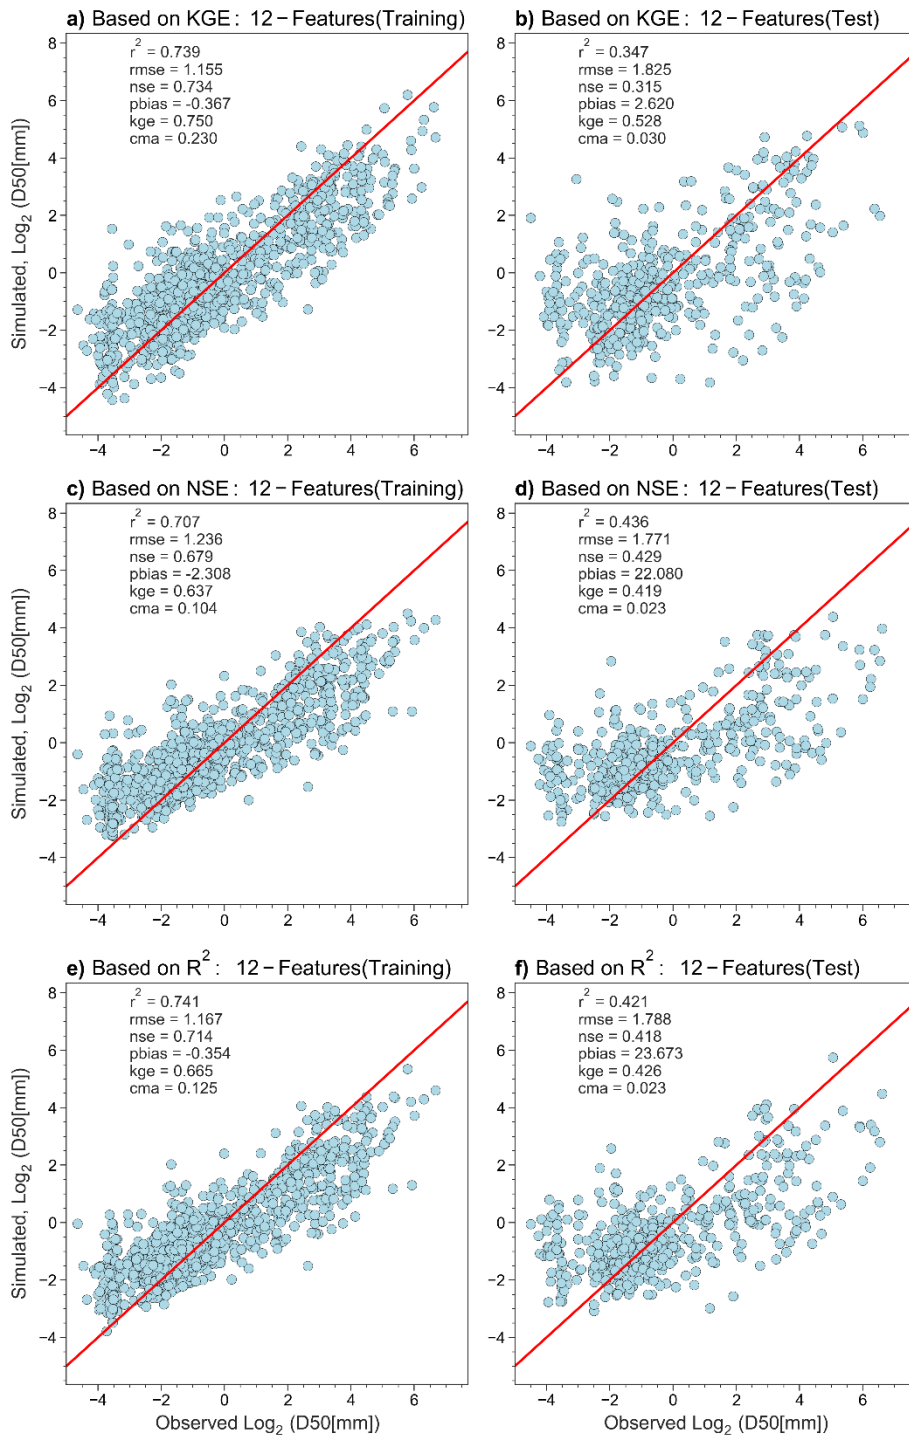

Figure S7: ML modeling using different objective functions



Table S1: List of the 76 predictive variables

| Group                 | Acronym       | Description                                                                                                                                                                          |
|-----------------------|---------------|--------------------------------------------------------------------------------------------------------------------------------------------------------------------------------------|
| Soil                  |               |                                                                                                                                                                                      |
| 1                     | TOT_SILTAVE   | Accumulated average percent of silt in soil based on total upstream routing                                                                                                          |
| 2                     | TOT_CLAYAVE   | Accumulated average percent of clay in soil based on total upstream routing                                                                                                          |
| 3                     | TOT_SANDAVE   | Average percent of sand in soil based on total upstream routing                                                                                                                      |
| 4                     | TOT_KFACT     | Accumulated average value for all upstream catchments for KFactor based on total upstream routing                                                                                    |
| 5                     | TOT_KFACT_UP  | Average value for KFactor in the upper soil horizon based on total upstream routing                                                                                                  |
| 6                     | TOT_NO10AVE   | Accumulated average percent by weight of soil material less than 3 inches in size that passes through a No. 10 sieve (2 millimeters) based on total upstream routing                 |
| 7                     | TOT_NO200AVE  | Accumulated average percent by weight of soil material less than 3 inches in size that passes through a No. 200 sieve (.074 millimeters) based on total upstream routing             |
| 8                     | TOT_NO4AVE    | Average percent by weight of soil material less than 3 inches in size that passes through a No. 4 sieve (5 millimeters) based on total upstream routing                              |
| Lithology and Geology |               |                                                                                                                                                                                      |
| 1                     | TOT_OLSON_K   | Estimated mean accumulated percentage of lithological potassium oxide (K <sub>2</sub> O) content in surface or near surface geology of all upstream NHDPlusV2 catchments             |
| 2                     | TOT_OLSON_CAO | Estimated mean accumulated percentage of lithological calcium oxide (CaO) content in surface or near surface geology of all upstream NHDPlusV2 catchments                            |
| 3                     | TOT_OLSON_FE  | Estimated mean accumulated percentage of lithological ferric oxide (Fe <sub>2</sub> O <sub>3</sub> ) content in surface or near surface geology of all upstream NHDPlusV2 catchments |

|    |                |                                                                                                                                                                                                       |
|----|----------------|-------------------------------------------------------------------------------------------------------------------------------------------------------------------------------------------------------|
| 4  | TOT_OLSON_MGO  | Estimated mean accumulated percentage of catchment that contains by the Olson geology of type rock type, Carbonate-rock aquifers.                                                                     |
| 5  | TOT_OLSON_P    | Estimated mean accumulated percentage of catchment that contains lithological phosphorus pentoxide (P2O5) content in surface or near surface geology of all upstream NHDPlusV2 catchments             |
| 6  | TOT_OLSON_S    | Estimated mean accumulated percentage of lithological sulfur (S) content in surface or near surface geology of all upstream NHDPlusV2 catchments                                                      |
| 7  | TOT_OLSON_SI   | Estimated mean accumulated percentage of lithological silicon dioxide (SiO2) content in surface or near surface geology of all upstream NHDPlusV2 catchments                                          |
| 8  | TOT_OLSON_UCS  | Estimated mean accumulated lithological compressive strength, measured as uniaxial compressive strength (in megaPascals, MPa) of surface or near surface geology of all upstream NHDPlusV2 catchments |
| 9  | TOT_OLSON_PERM | Estimated mean accumulated percentage of lithological hydraulic conductivity (in micrometers per second) of surface or near surface geology of all upstream NHDPlusV2 catchments                      |
| 10 | CARB           | Estimated percent of the catchment covered by Carbonate rocks such as limestone and dolostone                                                                                                         |
| 11 | CLAST_C        | Estimated percent of the catchment covered by Clastic sediments/rocks primarily made of sands, gravels, cobbles, or larger clasts.                                                                    |
| 12 | CLAST_F        | Estimated percent of the catchment covered by Clastic sediments/rocks primarily made of fine-grained materials such as shale, siltstone, claystone, mudstone.                                         |
| 13 | CLAST_U        | Estimated percent of the catchment covered by Clastic sediments/rocks of unknown or highly variable clast sizes                                                                                       |
| 14 | EVAP           | Estimated percent of the catchment covered by Evaporites or playas.                                                                                                                                   |

|            |                        |                                                                                                                                                                                                                                             |
|------------|------------------------|---------------------------------------------------------------------------------------------------------------------------------------------------------------------------------------------------------------------------------------------|
| 15         | META                   | Estimated percent of the catchment covered by Metamorphic rocks.                                                                                                                                                                            |
| 16         | PLUT_OTH               | Estimated percent of the catchment covered by Igneous, generally mafic, other less quartz-rich plutonic rocks, such as monzonite or gabbro.                                                                                                 |
| 17         | PLUT_QTZ               | Estimated percent of the catchment covered by Igneous, generally felsic, quartz-rich plutonic rocks such as granitoids, granite, granodacite.                                                                                               |
| 18         | VOLC_OTH               | Estimated percent of the catchment covered by Igneous, generally mafic, volcanic rocks, such as basalt that are mineralogically equivalent to the less quartz-rich plutonic rocks                                                           |
| 19         | VOLC_QTZ               | Estimated percent of the catchment covered by Igneous, generally felsic, volcanic rocks such as rhyolite and dacite that are mineralogically equivalent to the quartz-rich plutonic rocks                                                   |
| 20         | WATER                  | Estimated percent of the catchment covered by Water or ice.                                                                                                                                                                                 |
| Topography |                        |                                                                                                                                                                                                                                             |
| 1          | BANKFULL_WIDTH         | Estimated bankfull width of flowline reach calculated using Bieger 's regression equation (Bieger et al, 2015)                                                                                                                              |
| 2          | BANKFULL_DEPTH         | Estimated bankfull depth of flowline reach calculated using Bieger 's regression equation (Bieger et al, 2015)                                                                                                                              |
| 3          | BANKFULL_XSEC_AR<br>EA | Estimated bankfull cross sectional area of flowline reach calculated using Bieger 's regression equation (Bieger et al, 2015)                                                                                                               |
| 4          | sinuosity              | Flowline reach sinuosity at the flowline reach scale only                                                                                                                                                                                   |
| 5          | TOT_BASIN_SLOPE        | Average slope in percent of all upstream flowline catchments                                                                                                                                                                                |
| 6          | TOT_ELEV_MEAN          | Mean elevation in meters of all upstream flowline catchments                                                                                                                                                                                |
| 7          | TOT_STREAM_SLOPE       | Average slope in percent flowlines                                                                                                                                                                                                          |
| 8          | TOT_STREAM_LEN<br>GTH  | Total length of all upstream flowlines in kilometers                                                                                                                                                                                        |
| Climate    |                        |                                                                                                                                                                                                                                             |
| 1          | TOT_RF7100             | Accumulated estimated watershed mean annual average for the Rainfall and Runoff factor ("R factor" of Universal Soil Loss Equation) for the period 1971-2000 in hundreds of foot-ton force-inch/acre-hour per year for the period 1971-2000 |

|           |                 |                                                                                                                                     |
|-----------|-----------------|-------------------------------------------------------------------------------------------------------------------------------------|
| 2         | TOT_WDANN       | Accumulated value for all upstream catchments for the annual 30 year average (1961-1990) number of days of measurable precipitation |
| 3         | TOT_PRSNOW      | Accumulated estimated mean annual snow as a percent of total precipitation, 1905-2002                                               |
| 4         | AI              | Aridity Index                                                                                                                       |
| 5         | TOT_Temperature | Accumulated annual value of temperature                                                                                             |
| 6         | TOT_RFACT       | R factor of Universal Soil Loss Equation                                                                                            |
| NHDPlus   |                 |                                                                                                                                     |
| 1         | lengthkm        | Flowline length in kilometers                                                                                                       |
| 2         | streamorde      | stream order                                                                                                                        |
| 3         | totdasqkm       | Drainage area in square kilometers                                                                                                  |
| 4         | maxelevsmo      | maximum elevation of flowline                                                                                                       |
| 5         | minelevsmo      | minmum elevation of flowline                                                                                                        |
| 6         | slope           | Flowline slope                                                                                                                      |
| 7         | ve_ma           | flow velocity                                                                                                                       |
| 8         | pathlength      | Flowline distance from the basin outlet( termnial outlet)                                                                           |
| Hydrology |                 |                                                                                                                                     |
| 1         | TOT_RUN7100     | Accumulated estimated 30-year (1971-2000) average annual runoff, mm/year based on total upstream accumulation                       |
| 2         | TOT_STRM_DENS   | Density of streams defined as stream length (meters) divided by catchment(s) area (square meters).                                  |
| 3         | TOT_HLR_1       | Accumulated estimated percent of catchment that contains subhumid plains with permeable soils and bedrock                           |
| 4         | TOT_HLR_2       | Accumulated estimated percent of catchment that contains humid plains with permeable soils and bedrock                              |
| 5         | TOT_HLR_3       | Accumulated estimated percent of catchment that contains subhumid plains with impermeable soils and permeable bedrock               |
| 6         | TOT_HLR_4       | Accumulated estimated percent of catchment that contains humid plains with permeable soils and bedrock                              |
| 7         | TOT_HLR_5       | Accumulated estimated percent of catchment that contains arid plains with permeable soils and bedrock                               |

|    |            |                                                                                                                            |
|----|------------|----------------------------------------------------------------------------------------------------------------------------|
| 8  | TOT_HLR_6  | Accumulated estimated percent of catchment that contains subhumid plains with impermeable soils and bedrock                |
| 9  | TOT_HLR_7  | Accumulated estimated percent of catchment that contains humid plains with permeable soils and impermeable bedrock         |
| 10 | TOT_HLR_8  | Accumulated estimated percent of catchment that contains semi arid plains with impermeable soils and bedrock               |
| 11 | TOT_HLR_9  | Accumulated estimated percent of catchment that contains humid plateaus with impermeable soils and permeable bedrock       |
| 12 | TOT_HLR_10 | Accumulated estimated percent of catchment that contains arid plateaus with impermeable soils and permeable bedrock        |
| 13 | TOT_HLR_11 | Accumulated estimated percent of catchment that contains humid plateaus with impermeable soils and bedrock                 |
| 14 | TOT_HLR_12 | Accumulated estimated percent of catchment that contains semi arid plateaus with permeable soils and impermeable bedrock   |
| 15 | TOT_HLR_13 | Accumulated estimated percent of catchment that contains semi arid plateaus with impermeable soils and bedrock             |
| 16 | TOT_HLR_14 | Accumulated estimated percent of catchment that contains arid playas with permeable soils and bedrock                      |
| 17 | TOT_HLR_15 | Accumulated estimated percent of catchment that contains semi arid mountains with impermeable soils and permeable bedrock  |
| 18 | TOT_HLR_16 | Accumulated estimated percent of catchment that contains humid mountains with permeable soils and impermeable bedrock      |
| 19 | TOT_HLR_17 | Accumulated estimated percent of catchment that contains semi arid mountains with impermeable soils and bedrock            |
| 20 | TOT_HLR_18 | Accumulated estimated percent of catchment that contains semi arid mountains with permeable soils and impermeable bedrock  |
| 21 | TOT_HLR_19 | Accumulated estimated percent of catchment that contains very humid mountains with permeable soils and impermeable bedrock |
| 22 | TOT_HLR_20 | Accumulated estimated percent of catchment that contains humid mountains with permeable soils and impermeable bedrock      |
| 23 | TOT_SATOF  | Accumulated mean saturation overland flow as a percent of streamflow based on total upstream accumulation                  |

|    |             |                                                                                                                                                          |
|----|-------------|----------------------------------------------------------------------------------------------------------------------------------------------------------|
| 24 | TOT_IEOF    | Accumulated mean infiltration-excess overland flow as a percent of streamflow based on total upstream accumulation                                       |
| 25 | TOT_TWI     | Accumulated average topographic wetness index based on total upstream accumulation                                                                       |
| 26 | TOT_CONTACT | Accumulated contact time, the length of time it takes for water to drain along subsurface flow paths to the stream, based on total upstream accumulation |
